# Supplementary material for: A Focus on the Form of Gwendolyn Brooks.
Source: Royal Society of Chemistry journal article supplement (doi:10.1039/c7dt04744d), 1974-01-01
Supplement: c7dt04744d1.pdf [file c7dt04744d1.pdf]

## Electronic Supplementary Information

### Self-assembly of singlet-emitting double-helical silver dimers: the curious coordination chemistry and fluorescence of bisquinolylpyridone.

Charlotte M. A. Farrow,<sup>a</sup> Geoffrey R. Akien,<sup>a</sup> Nathan R. Halcovitch,<sup>a</sup> James A. Platts<sup>\*b</sup> and M. P. Coogan<sup>\*a</sup>

Table of Contents.

|    |    |                                      |
|----|----|--------------------------------------|
| P1 | S1 | Experimental Procedures and Data     |
| P2 | S2 | Spectral Data                        |
| P4 | S3 | Computational Procedures and Results |

## S1 Experimental Procedures and Data

### 2,6-Bis(2-quinolyl)-4(1H)-pyridone 1.

To a stirred suspension of 1,5-bis(2-quinolyl)-pentane-1,3,5-trione (888 mg, 24.1 mmol) in methanol (25 ml) at 60 °C was added ammonium acetate (1.50 g, 19.4 mmol) and the stirred mixture heated at 60 °C for 66 h. After cooling to room temperature, the reaction mixture was treated with water (100 ml) and a yellow gel-like substance separated by prolonged vacuum filtration. The product was recrystallised from an ethanol acetone mixture to give the title compound as a white solid (595 mg, 1.77 mmol, 74%). <sup>1</sup>H NMR (400 MHz, CD<sub>3</sub>OD): δ 8.51 (2H d, J = 8.1 Hz, H8,8') 8.28 (2H, d, J = 8.2 Hz, H4,4') 8.20 (2H, d, J = 8.2 Hz, H3,3') 8.03 (2H, d, J = 8.2 Hz, H5,5') 7.91 (2H, m, H6,6') 7.72 (2H, m, H7,7') 7.33 (2H, s, pyridone H3,3'). <sup>13</sup>C{<sup>1</sup>H} NMR (400 MHz, DMSO-d<sub>6</sub>): δ 166.6, 156.7, 155.6, 147.6, 137.5, 130.5, 129.7, 128.6, 128.4, 127.6, 119.3, 109.8 IR ν max: 3271, 3055, 1634 (C=O), 1564 1502, 1429, 1258 cm<sup>-1</sup>. m/z (ESI, HRMS 350.1277, C<sub>23</sub>H<sub>15</sub>N<sub>3</sub>O predicts 350.1288. C<sub>23</sub>H<sub>15</sub>N<sub>3</sub>O.2H<sub>2</sub>O requires C 71.7 H 4.97 N 10.9 found C 71.7 H 4.67 N 11.1 %

### Di-(silver-(I)-(2,6-Bis(2-quinolyl)-4(1H)-pyridonyl)) tetrafluoroborate 2.

To a round bottom flask was added ligand **1** (67.0 mg, 0.191 mmol) and silver (I) tetrafluoroborate (40 mg, 0.206 mg) and acetonitrile (20 ml) and the mixture heated at reflux for 5 minutes during which time the reactants passed into solution. The mixture was then concentrated under vacuum to 2 ml and treated with diethyl ether (2 ml) giving a white precipitate of the title compound (68 mg, 0.128 mmol, 67%). <sup>1</sup>H NMR (400 MHz, CD<sub>3</sub>CN): δ 8.07 (1H, d, J = 8.1 Hz, H8,8') 7.80 (1H, d, J = 7.7 Hz, H5,5') 7.63 (1H, s, pyridine H3,3') 7.58 (3H, m, H3,3',4,4',7,7') 7.49 (1H, m, H6,6'). <sup>13</sup>C{<sup>1</sup>H} NMR (400 MHz, CD<sub>3</sub>CN, saturated solution, some peaks not observed): δ 145.2, 139.0, 131.4, 129.1, 128.3, 128.2, 128.2, 120.3, 117.3, 113.0. m/z (ESI, HRMS) observed 805.1483 C<sub>46</sub>H<sub>30</sub>N<sub>6</sub>O<sub>2</sub>Ag (L<sub>2</sub>Ag) requires 805.1476. C<sub>46</sub>H<sub>30</sub>N<sub>6</sub>O<sub>2</sub>Ag<sub>2</sub>B<sub>2</sub>F<sub>8</sub>.H<sub>2</sub>O requires C 50.0 H 2.92 N 7.60 found C 49.8 H 2.71 N 7.99 %

## S2 Spectral Data

Mouse Sensitivity: 1.0  
6.438 ppm / 2576.056 Hz  
Sum = 6.9950

DEFINE REGION MODE  
Define: Drag using left mouse button  
Return: Left-click highlighted icon

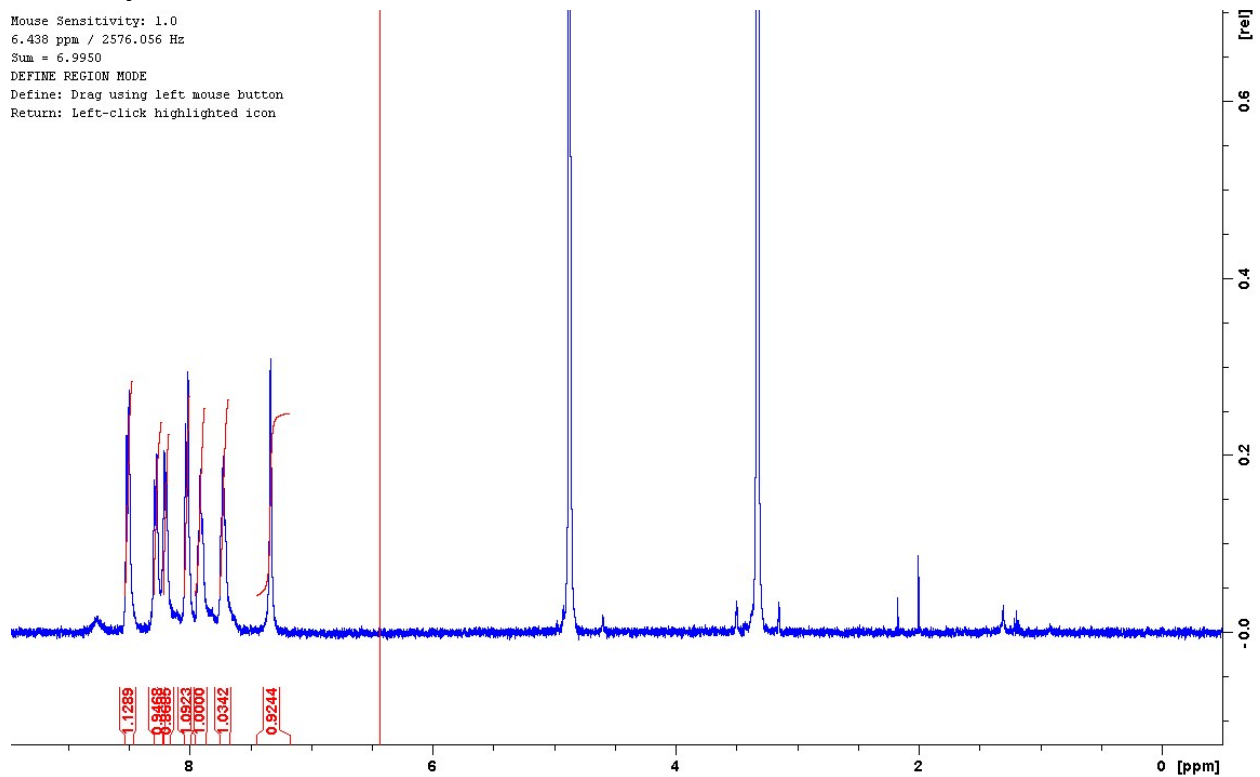

### <sup>1</sup>H NMR of 1 (MeOD-d<sub>4</sub>)

Mouse Sensitivity: 1.0  
11.86 ppm / 4746.58 Hz  
Sum = 17.2262

DEFINE REGION MODE  
Define: Drag using left mouse button  
Return: Left-click highlighted icon

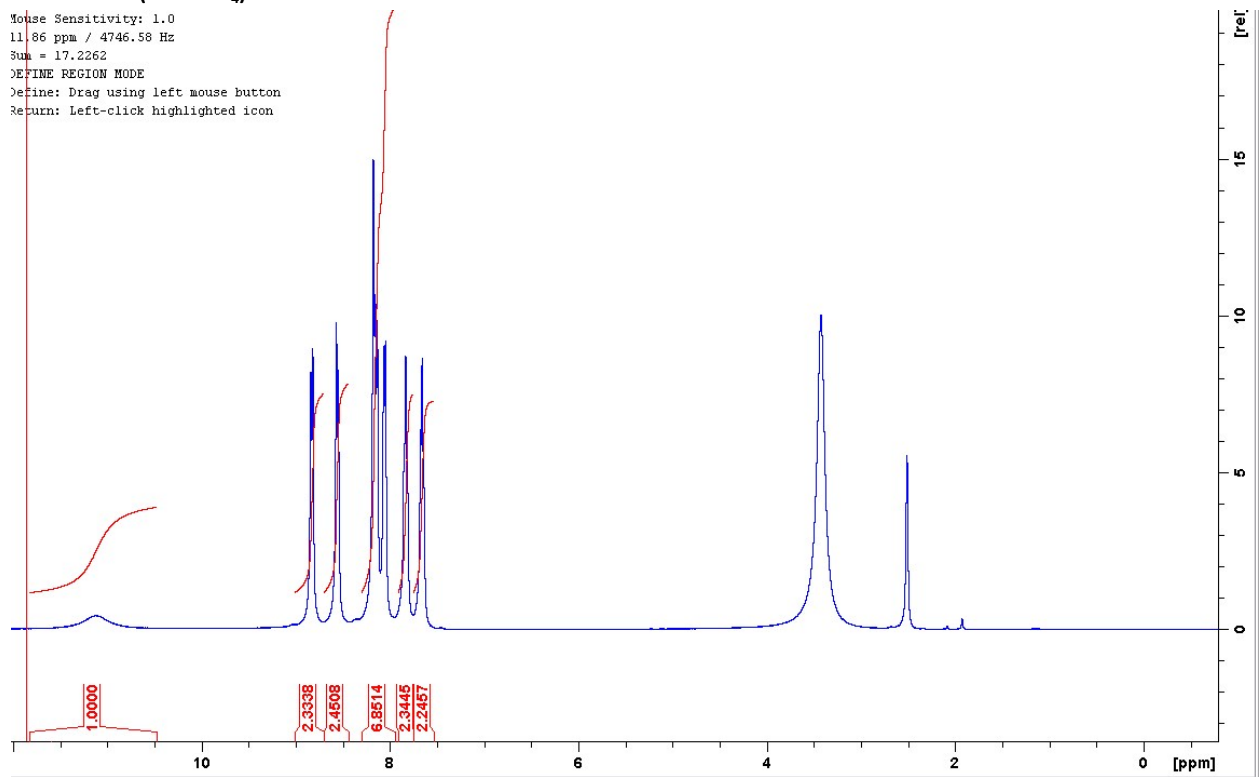

### <sup>1</sup>H NMR of 1 (DMSO-d<sub>6</sub>)

Mouse Sensitivity: 1.0  
-17.8 ppm / -1794.9 Hz  
Sum = 0.0000

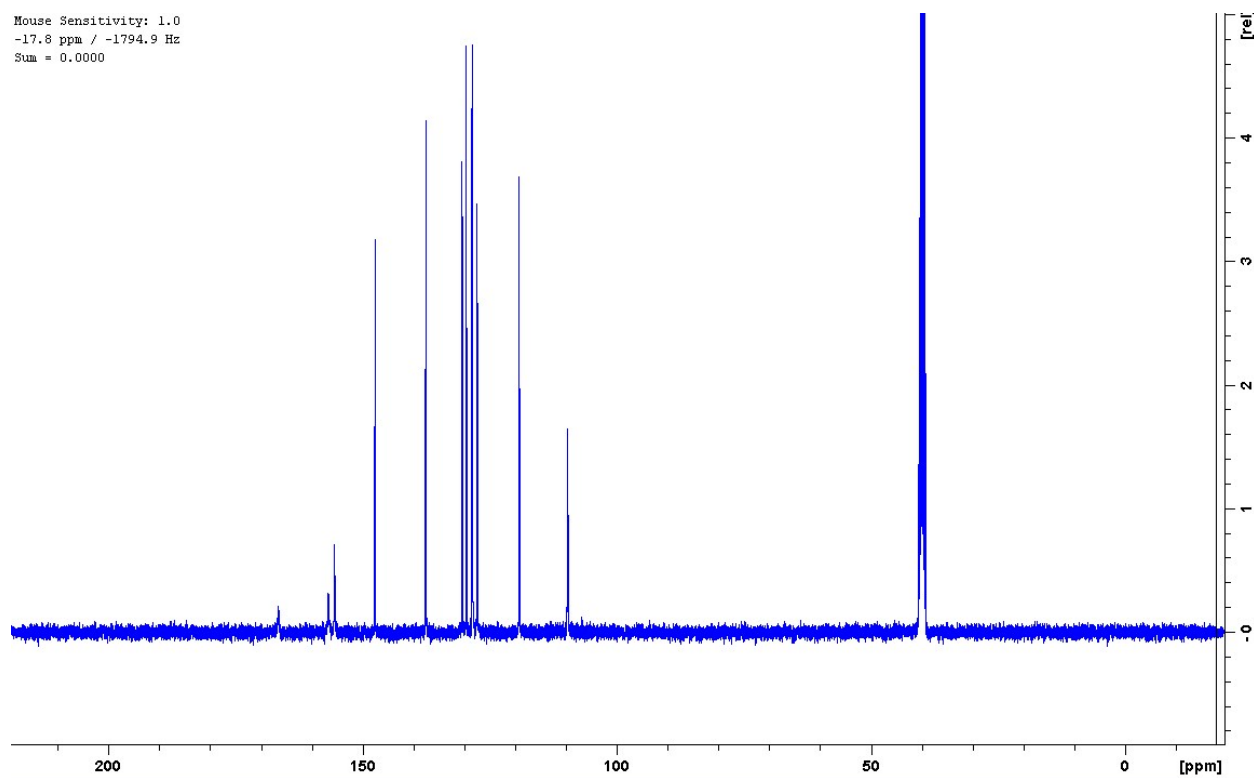

<sup>13</sup>C NMR of 1 (DMSO-d<sub>6</sub>)

Mouse Sensitivity: 1.0  
7.778 ppm / 3112.175 Hz  
Sum = 7.1621  
>DEFINE REGION MODE  
>Define: Drag using left mouse button  
>Return: Left-click highlighted icon

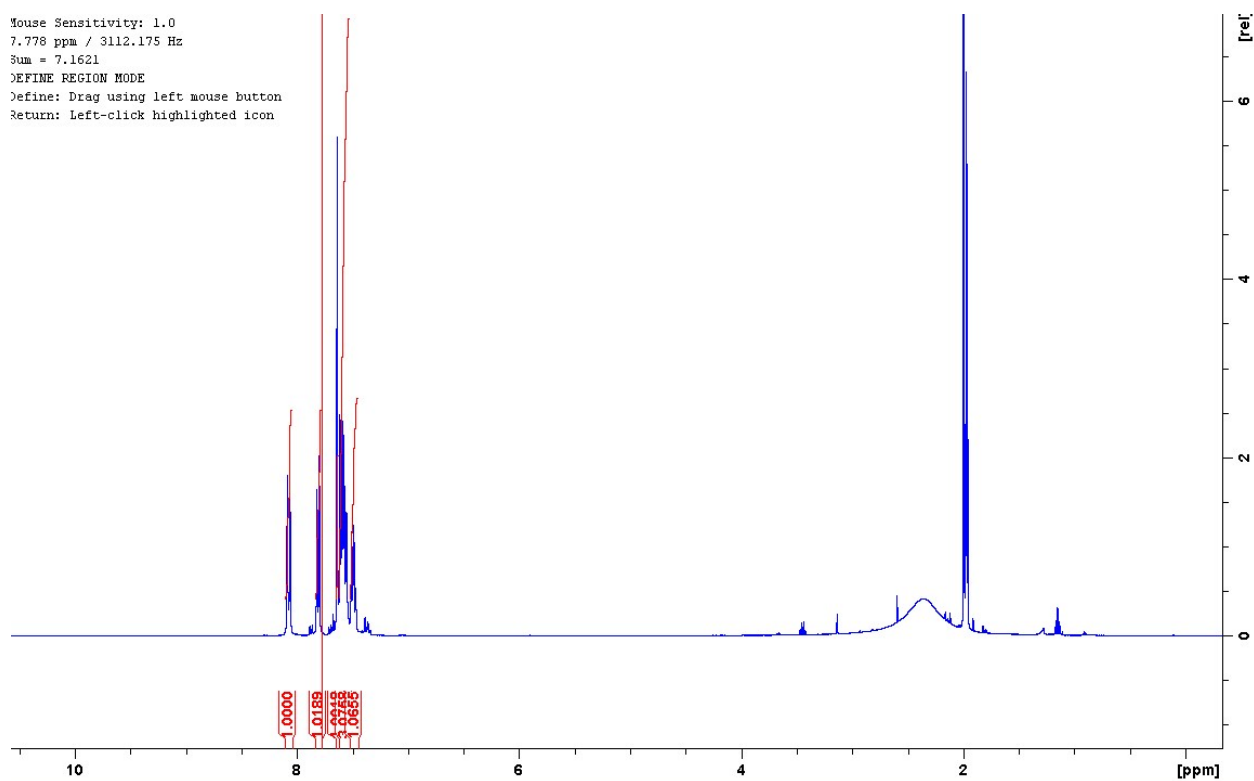

<sup>1</sup>H NMR of 2 (CD<sub>3</sub>CN)

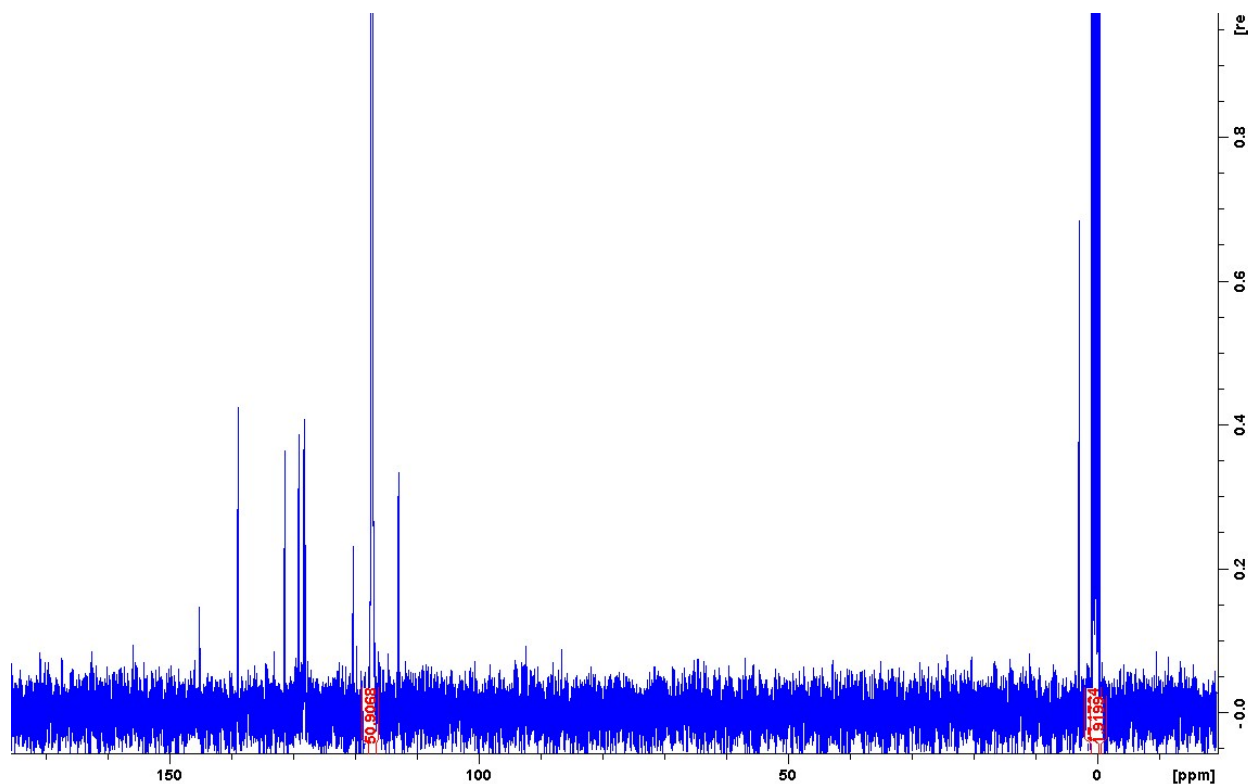

<sup>13</sup>C NMR of 2 (CD<sub>3</sub>CN)

Measured region for 350.1277 m/z

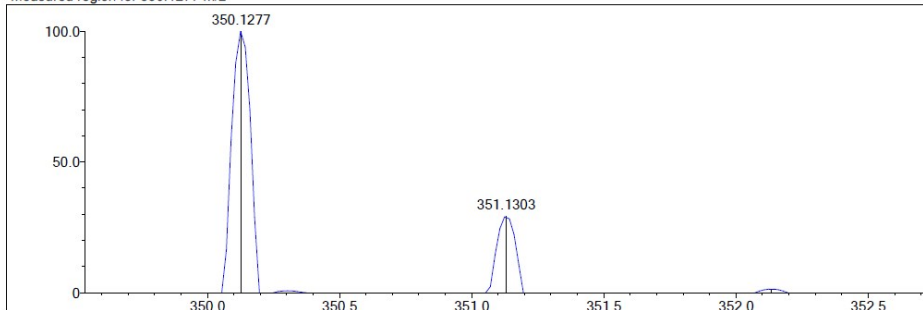

C<sub>23</sub>H<sub>15</sub>N<sub>3</sub>O [M+H]<sup>+</sup> : Predicted region for 350.1288 m/z

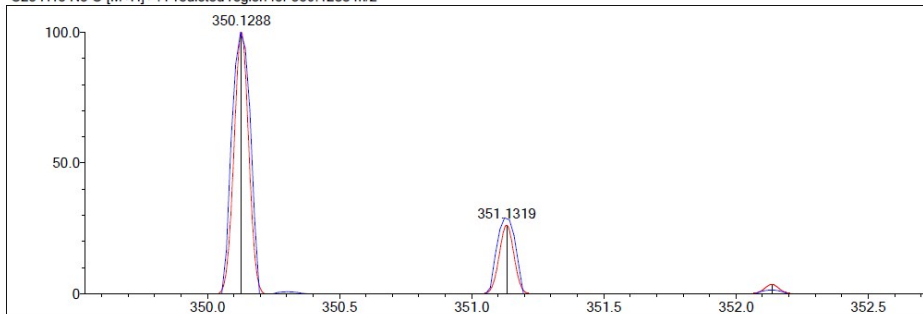

| Rank | Score | Formula (M)                                      | Ion                | Meas. m/z | Pred. m/z | Df. (mDa) | Df. (ppm) | Iso   | DBE  |
|------|-------|--------------------------------------------------|--------------------|-----------|-----------|-----------|-----------|-------|------|
| 2    | 88.97 | C <sub>23</sub> H <sub>15</sub> N <sub>3</sub> O | [M+H] <sup>+</sup> | 350.1277  | 350.1288  | -1.1      | -3.14     | 94.00 | 18.0 |

HMRS of 1 (ESI)

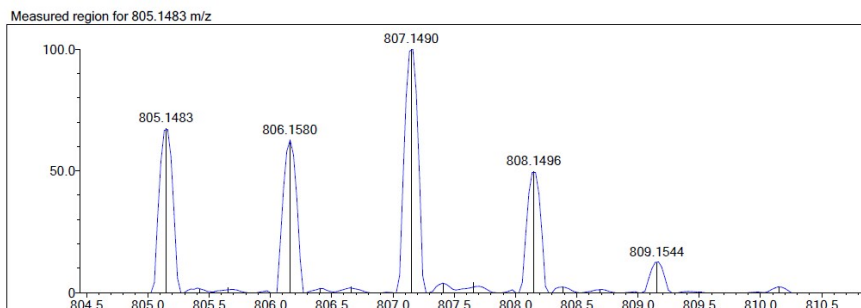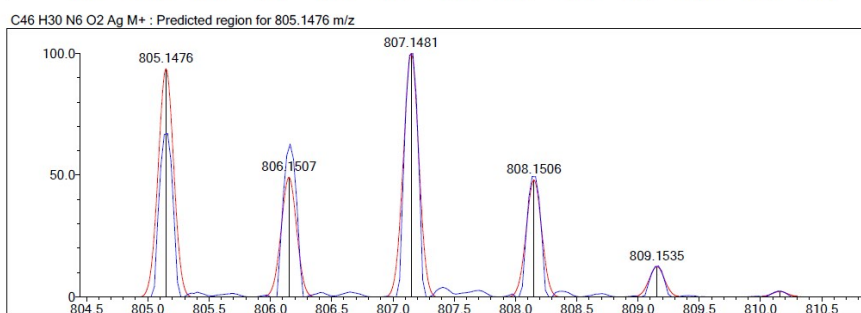

| Rank | Score | Formula (M)      | Ion | Meas. m/z | Pred. m/z | Df. (mDa) | Df. (ppm) | Iso   | DBE  |
|------|-------|------------------|-----|-----------|-----------|-----------|-----------|-------|------|
| 1    | 60.46 | C46 H30 N6 O2 Ag | M+  | 805.1483  | 805.1476  | 0.7       | 0.87      | 60.46 | 34.5 |

HMRS of 2 (ESI)

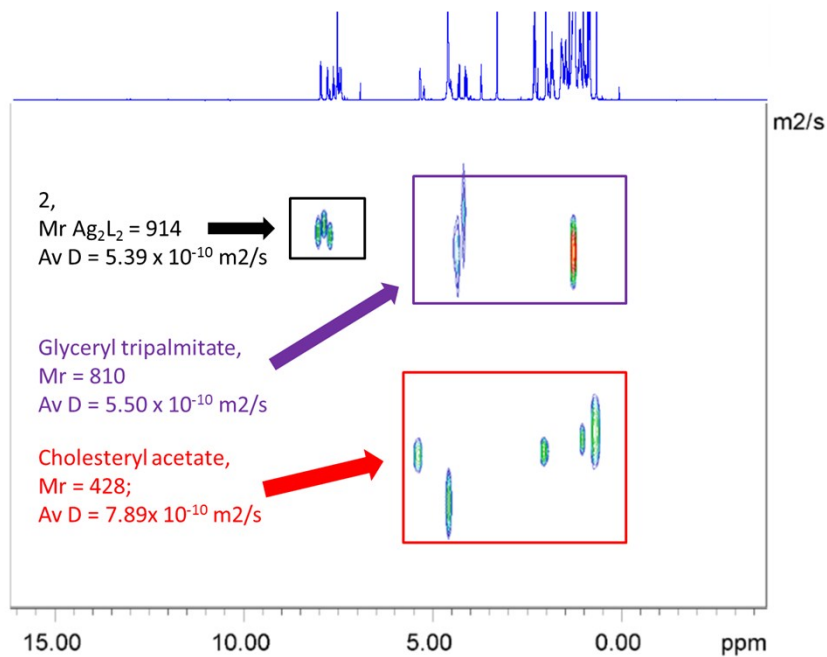

DOSY Spectrum of 2.

The insolubility of **2** in solvents for which DOSY/Mr relationships are accurately established prevented direct Mr assessment of **2** which was instead compared to internal standards, glycerol tripalmitate and cholesterol acetate to assess solution speciation of **2** (c.f. monomeric forms AgL, Mr = 457, AgL<sub>2</sub>, Mr = 807).

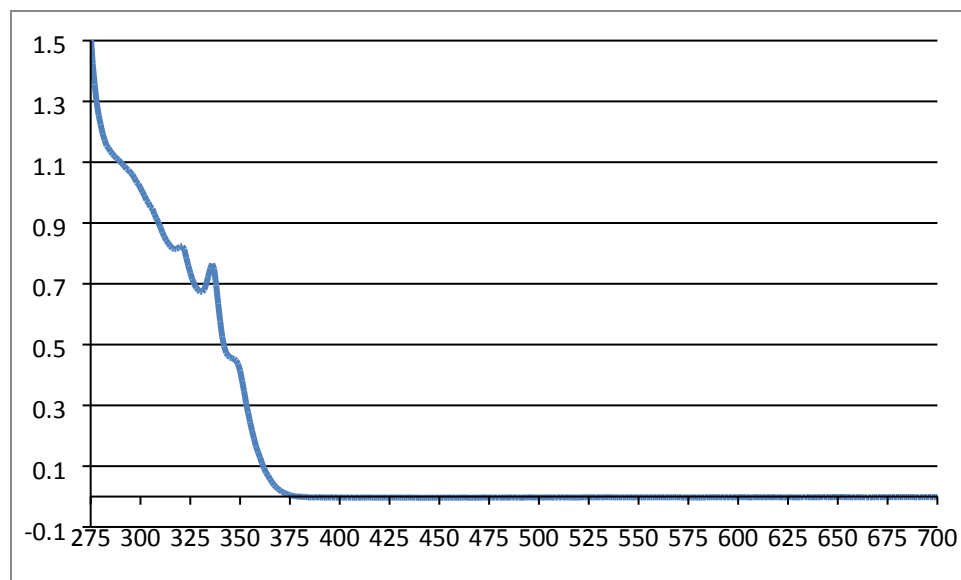

UV Vis of **1** (0.003 mM MeCN).

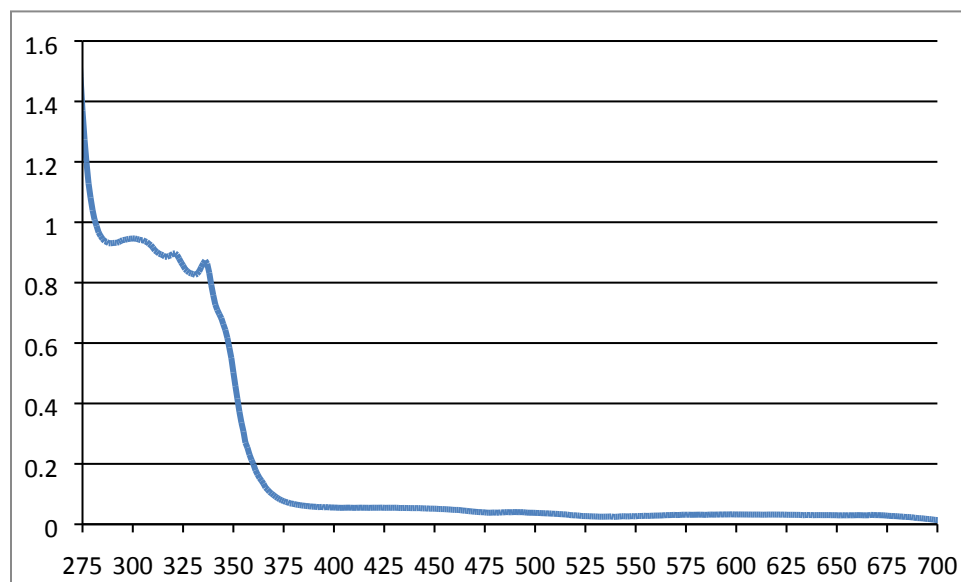

UV Vis of **2** (0.015 mM MeCN).

## S2 Computational Procedures and Results.

### Theoretical Calculations

Geometry of **1** and **2** were fully optimised without any symmetry constraint using the M06-2X functional [a] and a basis set consisting of 6-31G(d) on light atoms [b] and Stuttgart-Dresden basis/ECP on Ag [c]. TD-DFT calculations were performed using the range-separated CAM-B3LYP method [d], with the same basis set. All such calculations used Gaussian09 [e]. ZINDO/S [f] calculations on DFT optimised geometries were carried out using the ORCA package [g].

[a] Y. Zhao and D. G. Truhlar, *Theor. Chem. Acc.*, 2008, 120, 215.

[b] R. Ditchfield, W. J. Hehre, and J. A. Pople, *J. Chem. Phys.*, 1971, 54, 724; P. C. Hariharan and J. A. Pople, *Theor. Chem. Acc.*, 1973, 28, 213.

[c] D. Andrae, U. Haeussermann, M. Dolg, H. Stoll, and H. Preuss, *Theor. Chem. Acc.*, 1990, 77, 123.

[d] T. Yanai, D. Tew, and N. Handy, *Chem. Phys. Lett.*, 2004, 393, 51.

[e] Gaussian 09, Revision C.01, M. J. Frisch, G. W. Trucks, H. B. Schlegel, G. E. Scuseria, M. A. Robb, J. R. Cheeseman, G. Scalmani, V. Barone, B. Mennucci, G. A. Petersson, H. Nakatsuji, M. Caricato, X. Li, H. P. Hratchian, A. F. Izmaylov, J. Bloino, G. Zheng, J. L. Sonnenberg, M. Hada, M. Ehara, K. Toyota, R. Fukuda, J. Hasegawa, M. Ishida, T. Nakajima, Y. Honda, O. Kitao, H. Nakai, T. Vreven, J. A. Montgomery, Jr., J. E. Peralta, F. Ogliaro, M. Bearpark, J. J. Heyd, E. Brothers, K. N. Kudin, V. N. Staroverov, T. Keith, R. Kobayashi, J. Normand, K. Raghavachari, A. Rendell, J. C. Burant, S. S. Iyengar, J. Tomasi, M. Cossi, N. Rega, J. M. Millam, M. Klene, J. E. Knox, J. B. Cross, V. Bakken, C. Adamo, J. Jaramillo, R. Gomperts, R. E. Stratmann, O. Yazyev, A. J. Austin, R. Cammi, C. Pomelli, J. W. Ochterski, R. L. Martin, K. Morokuma, V. G. Zakrzewski, G. A. Voth, P. Salvador, J. J. Dannenberg, S. Dapprich, A. D. Daniels, O. Farkas, J. B. Foresman, J. V. Ortiz, J. Cioslowski,

and D. J. Fox, Gaussian, Inc., Wallingford CT, 2010.

[f] F. Neese, *Wiley interdisciplinary Reviews - Computational Molecular Science*, 2012, 2, 73.

[g] M. C. Zerner, G. H. Lowe, R. F. Kirchner, and U. T. Mueller-Westerhoff, *J. Am. Chem. Soc.*, 1980, 102, 589.

### ZINDO orbital energies for 1.

STATE 1: E= 0.091797 au 2.498 eV 20147.2 cm<sup>\*\*</sup>-1

59a -> 64a : 0.785075 (c= -0.88604482)

59a -> 67a : 0.011267 (c= -0.10614526)

59a -> 70a : 0.012985 (c= 0.11395308)

59a -> 71a : 0.080375 (c= 0.28350400)

59a -> 72a : 0.013697 (c= -0.11703354)

59a -> 73a : 0.018726 (c= 0.13684160)

59a -> 83a : 0.030726 (c= -0.17528945)

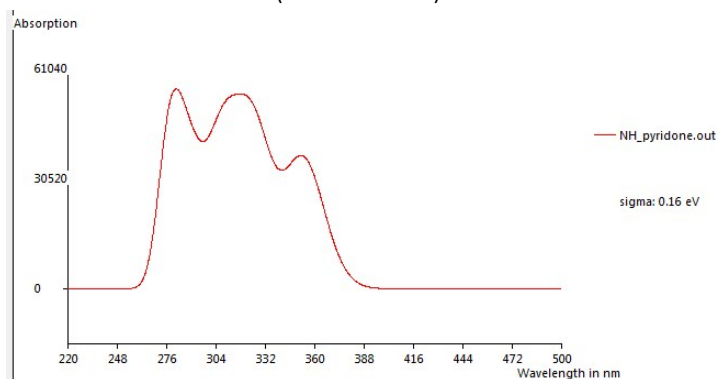

Predicted absorption spectrum for 1 (pyridone form)

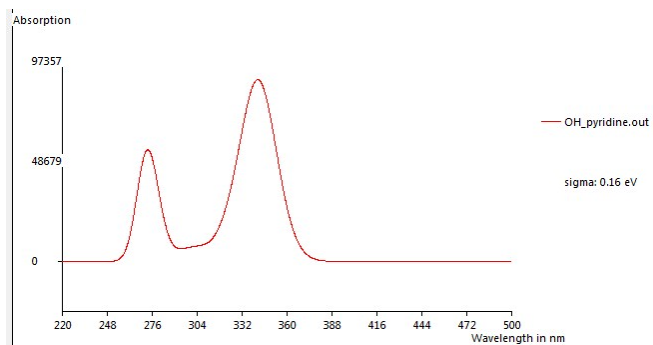

Predicted absorption spectrum for 1 (hydroxypyridine form)

### Pyridone

State Energy Wavelength fosc  
(cm-1) (nm)

|    |         |       |                         |
|----|---------|-------|-------------------------|
| 1  | 27473.8 | 364.0 | 0.001214229             |
| 2  | 28265.5 | 353.8 | 0.258966995             |
| 11 | 13718.5 | 728.9 | spin forbidden (mult=3) |

### Pyridine

|    |         |       |                         |
|----|---------|-------|-------------------------|
| 1  | 20147.2 | 496.3 | 0.001018456             |
| 2  | 29164.0 | 342.9 | 0.820051302             |
| 11 | 12841.0 | 778.8 | spin forbidden (mult=3) |

Table S 1

Predicted (ZINDO) Emission Bands 1 in each form.

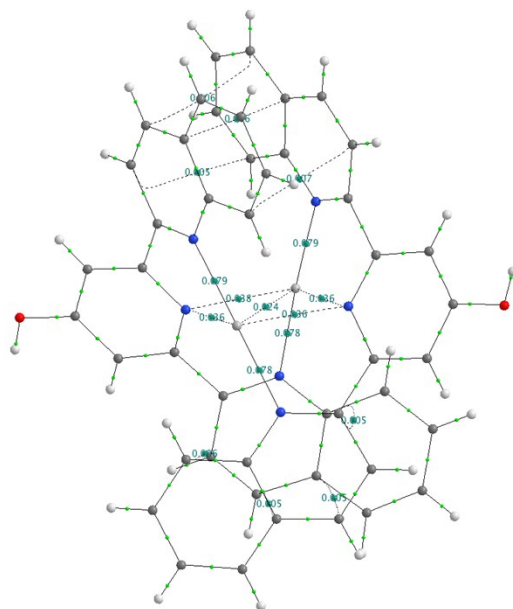

Bond Paths for 2.



## S4 Crystallographic Data

Crystallographic Tables for **1**, **1-a**, **1-b**, **2**, **2-a**.

| Identification code                         | <b>1</b>                                                      | <b>1-a</b>                                                    | <b>1-b</b>                                                     |
|---------------------------------------------|---------------------------------------------------------------|---------------------------------------------------------------|----------------------------------------------------------------|
| CCDC number                                 | 1572595                                                       | 1572597                                                       | 1572598                                                        |
| Empirical formula                           | C <sub>23</sub> H <sub>15</sub> N <sub>3</sub> O <sub>1</sub> | C <sub>46</sub> H <sub>30</sub> N <sub>6</sub> O <sub>2</sub> | C <sub>92</sub> H <sub>60</sub> N <sub>12</sub> O <sub>4</sub> |
| Formula weight                              | 349.38                                                        | 698.76                                                        | 1397.52                                                        |
| Temperature/K                               | 100.00(10)                                                    | 100.00(10)                                                    | 100.01(10)                                                     |
| Crystal system                              | monoclinic                                                    | monoclinic                                                    | triclinic                                                      |
| Space group                                 | I2/a                                                          | P2 <sub>1</sub> /n                                            | P-1                                                            |
| a/Å                                         | 26.3237(5)                                                    | 18.2068(4)                                                    | 11.5071(2)                                                     |
| b/Å                                         | 3.84158(8)                                                    | 6.07880(19)                                                   | 17.7155(4)                                                     |
| c/Å                                         | 35.9106(8)                                                    | 30.4579(10)                                                   | 19.7489(4)                                                     |
| α/°                                         | 90                                                            | 90                                                            | 104.8568(17)                                                   |
| β/°                                         | 91.6279(19)                                                   | 97.629(3)                                                     | 105.8861(17)                                                   |
| γ/°                                         | 90                                                            | 90                                                            | 105.3698(17)                                                   |
| Volume/Å <sup>3</sup>                       | 3629.97(13)                                                   | 3341.12(17)                                                   | 3490.89(13)                                                    |
| Z                                           | 8                                                             | 4                                                             | 2                                                              |
| ρ <sub>calc</sub> /g/cm <sup>3</sup>        | 1.279                                                         | 1.389                                                         | 1.330                                                          |
| μ/mm <sup>1</sup>                           | 0.639                                                         | 0.695                                                         | 0.665                                                          |
| F(000)                                      | 1456.0                                                        | 1456.0                                                        | 1456.0                                                         |
| Crystal size/mm <sup>3</sup>                | 0.27 × 0.03 × 0.02                                            | 0.47 × 0.03 × 0.03                                            | 0.35 × 0.22 × 0.05                                             |
| Radiation                                   | CuKα (λ = 1.54184)                                            | CuKα (λ = 1.54184)                                            | CuKα (λ = 1.54184)                                             |
| 2θ range for data collection/°              | 6.718 to 153.178                                              | 5.362 to 153.366                                              | 4.976 to 153.572                                               |
| Index ranges                                | -28 ≤ h ≤ 33, -4 ≤ k ≤ 4, -44 ≤ l ≤ 45                        | -22 ≤ h ≤ 15, -7 ≤ k ≤ 7, -36 ≤ l ≤ 38                        | -14 ≤ h ≤ 14, -22 ≤ k ≤ 22, -23 ≤ l ≤ 24                       |
| Reflections collected                       | 13526                                                         | 28071                                                         | 58230                                                          |
| Independent reflections                     | 3752 [R <sub>int</sub> = 0.0199, R <sub>sigma</sub> = 0.0183] | 6938 [R <sub>int</sub> = 0.0530, R <sub>sigma</sub> = 0.0488] | 14565 [R <sub>int</sub> = 0.0281, R <sub>sigma</sub> = 0.0249] |
| Data/restraints/parameters                  | 3752/0/248                                                    | 6938/0/488                                                    | 14565/0/1054                                                   |
| Goodness-of-fit on F <sup>2</sup>           | 1.032                                                         | 1.049                                                         | 1.016                                                          |
| Final R indexes [I ≥ 2σ(I)]                 | R <sub>1</sub> = 0.0387, wR <sub>2</sub> = 0.1028             | R <sub>1</sub> = 0.0517, wR <sub>2</sub> = 0.1270             | R <sub>1</sub> = 0.0461, wR <sub>2</sub> = 0.1221              |
| Final R indexes [all data]                  | R <sub>1</sub> = 0.0433, wR <sub>2</sub> = 0.1069             | R <sub>1</sub> = 0.0702, wR <sub>2</sub> = 0.1408             | R <sub>1</sub> = 0.0531, wR <sub>2</sub> = 0.1294              |
| Largest diff. peak/hole / e Å <sup>-3</sup> | 0.33/-0.21                                                    | 0.25/-0.23                                                    | 0.69/-0.23                                                     |

$$R_1 = \sum ||F_o| - |F_c| / \sum |F_o|; wR_2 = [\sum (w(F_o^2 - F_c^2)^2 / \sum w(F_o^2)^2)]^{1/2}$$

|                                             |                                                                                                                   |                                                                                                             |
|---------------------------------------------|-------------------------------------------------------------------------------------------------------------------|-------------------------------------------------------------------------------------------------------------|
| Identification code                         | <b>2</b>                                                                                                          | <b>2-a</b>                                                                                                  |
| CCDC number                                 | 1572596                                                                                                           | 1572599                                                                                                     |
| Empirical formula                           | C <sub>47</sub> H <sub>31.5</sub> Ag <sub>2</sub> B <sub>2</sub> F <sub>8</sub> N <sub>6.5</sub> O <sub>2.5</sub> | C <sub>50</sub> H <sub>35</sub> Ag <sub>2</sub> F <sub>6</sub> N <sub>7</sub> O <sub>9</sub> S <sub>2</sub> |
| Formula weight                              | 1116.65                                                                                                           | 1271.71                                                                                                     |
| Temperature/K                               | 100.00(10)                                                                                                        | 100.01(10)                                                                                                  |
| Crystal system                              | triclinic                                                                                                         | monoclinic                                                                                                  |
| Space group                                 | P-1                                                                                                               | P2 <sub>1</sub> /c                                                                                          |
| a/Å                                         | 13.5216(5)                                                                                                        | 12.72079(13)                                                                                                |
| b/Å                                         | 14.9223(6)                                                                                                        | 30.3305(3)                                                                                                  |
| c/Å                                         | 21.6131(8)                                                                                                        | 13.47657(15)                                                                                                |
| α/°                                         | 87.526(3)                                                                                                         | 90                                                                                                          |
| β/°                                         | 80.106(3)                                                                                                         | 112.9233(13)                                                                                                |
| γ/°                                         | 85.894(3)                                                                                                         | 90                                                                                                          |
| Volume/Å <sup>3</sup>                       | 4283.0(3)                                                                                                         | 4789.01(10)                                                                                                 |
| Z                                           | 4                                                                                                                 | 4                                                                                                           |
| ρ <sub>calc</sub> /g/cm <sup>3</sup>        | 1.732                                                                                                             | 1.764                                                                                                       |
| μ/mm <sup>1</sup>                           | 8.088                                                                                                             | 8.168                                                                                                       |
| F(000)                                      | 2220.0                                                                                                            | 2544.0                                                                                                      |
| Crystal size/mm <sup>3</sup>                | 0.15 × 0.07 × 0.06                                                                                                | 0.43 × 0.20 × 0.12                                                                                          |
| Radiation                                   | CuKα (λ = 1.54184)                                                                                                | CuKα (λ = 1.54184)                                                                                          |
| 2θ range for data collection/°              | 5.94 to 153.36                                                                                                    | 5.828 to 152.83                                                                                             |
| Index ranges                                | -17 ≤ h ≤ 16, -18 ≤ k ≤ 18, -27 ≤ l ≤ 18                                                                          | -15 ≤ h ≤ 13, -37 ≤ k ≤ 38, -15 ≤ l ≤ 16                                                                    |
| Reflections collected                       | 49184                                                                                                             | 40177                                                                                                       |
| Independent reflections                     | 17514 [R <sub>int</sub> = 0.0348, R <sub>sigma</sub> = 0.0385]                                                    | 9982 [R <sub>int</sub> = 0.0419, R <sub>sigma</sub> = 0.0342]                                               |
| Data/restraints/parameters                  | 17514/6/1240                                                                                                      | 9982/0/689                                                                                                  |
| Goodness-of-fit on F <sup>2</sup>           | 1.039                                                                                                             | 1.055                                                                                                       |
| Final R indexes [I ≥ 2σ (I)]                | R <sub>1</sub> = 0.0632, wR <sub>2</sub> = 0.1615                                                                 | R <sub>1</sub> = 0.0305, wR <sub>2</sub> = 0.0794                                                           |
| Final R indexes [all data]                  | R <sub>1</sub> = 0.0827, wR <sub>2</sub> = 0.1768                                                                 | R <sub>1</sub> = 0.0317, wR <sub>2</sub> = 0.0804                                                           |
| Largest diff. peak/hole / e Å <sup>-3</sup> | 3.25/-1.96                                                                                                        | 0.79/-1.00                                                                                                  |

$$R_1 = \sum ||F_o| - |F_c| / \sum |F_o|; wR_2 = [\sum (w(F_o^2 - F_c^2)^2 / \sum w(F_o^2)^2)]^{1/2}$$

Single crystals were mounted on a Mitegen loop using Paratone-N oil and were cooled under a stream of nitrogen. Figures and tables were generated using OLEX2.<sup>1</sup> Crystal data were collected on a Rigaku Oxford Diffraction SuperNova diffractometer using Cu Kα radiation; the structures were solved by direct methods using ShelXT<sup>2</sup> and refined by least squares using ShelXL.<sup>3</sup>

1. Dolomanov, O.V., Bourhis, L.J., Gildea, R.J, Howard, J.A.K. & Puschmann, H. (2009), *J. Appl. Cryst.* *42*, 339-341.
2. Sheldrick, G.M. (2015). *Acta Cryst.* A71, 3-8.
3. Sheldrick, G.M. (2008). *Acta Cryst.* A64, 112-122.
